# Supplementary material for: The Unexplored Virome of Two Atlantic Coast Fish: Contribution of Next-Generation Sequencing to Fish Virology
Source: PubMed Central journal article supplement (PMC7695296; doi:10.3390/foods9111634), 2020-11-09
Supplement: foods-09-01634-s001.pdf [file foods-09-01634-s001.pdf]

**Table S1.** Accession numbers of sequences used for phylogenetic analysis, including the sequences obtained in this study (\*) and those downloaded from GenBank: a) sequences used for phylogenetic analysis of Viral Nervous Necrosis Virus obtained from a gilthead seabream gills from Algarve, b) sequences used for phylogenetic analysis of Infectious Pancreatic Necrotic Virus amplified from an Atlantic horse mackerel skin sample from Peniche, c) sequences used for phylogenetic analysis of Hepatitis B virus obtained from Atlantic horse mackerel gills from Algarve, d) sequences used for phylogenetic analysis of Rhinovirus A amplified from gilthead seabream skin from Peniche; e) sequences used for phylogenetic analysis of Norovirus GII obtained from gilthead seabream skin from Algarve.

a)

| Country     | Origin                 | Access number |
|-------------|------------------------|---------------|
| Japan       | Striped jack           | AB056572      |
| Japan       | Striped jack           | D30814        |
| Japan       | European seabass       | AF175519      |
| Italy       | European Seabass       | JN189936      |
| Spain       | Senegalese sole        | JN189919      |
| Italy       | Senegalese sole        | JN189932      |
| Croatia     | European seabass       | JN189915      |
| Portugal    | Senegalese sole        | FJ803920      |
| Portugal    | Seabream               | JN189916      |
| China       | Threadfin porgy        | KP994911      |
| Cyprus      | Seabream               | JN189920      |
| Cyprus      | Seabream               | KY354697      |
| Italy       | Seabream               | KY354703      |
| Japan       | Tiger puffer           | D38637        |
| Japan       | Tiger puffer           | EU236149      |
| Japan       | Japanese flounder      | AB045980      |
| Australia   | Redspotted grouper     | GQ402013      |
| Israel      | European Seabass       | AY284969      |
| Israel      | White Grouper          | AY284963      |
| China       | Hybrid grouper         | MK107836      |
| China       | Tiger Grouper          | KX027363      |
| China       | Tiger grouper          | HQ859940      |
| Malaysia    | Tiger grouper          | MN493039      |
| Japan       | Sevenband grouper      | AB373029      |
| Spain       | Seabass                | FJ829452      |
| India       | Asian seabass          | JF412273      |
| India       | Asian seabass          | GU953669      |
| India       | Asian seabass          | JF412263      |
| India       | Asian seabass          | GU826692      |
| India       | Asian seabass          | GU826693      |
| India       | Asian seabass          | FR669249      |
| India       | Asian seabass          | GU563883      |
| China       | Orange-spotted grouper | MG874758      |
| Taiwan      | Giant grouper          | MF565445      |
| Australia   | Redspotted grouper     | GQ402011      |
| Taiwan      | Giant grouper          | KM588181      |
| Vietnam     | Mouse grouper          | KU705815      |
| South Korea | Sevenband grouper      | KM095959      |
| Malaysia    | Golden pompano         | GQ904199      |
| China       | Sevenband grouper      | KP455642      |
| Malaysia    | Asian seabass          | HQ859948      |
| Malaysia    | Tiger grouper          | HQ859938      |
| Malaysia    | Asian seabass          | HQ859935      |
| Malaysia    | Asian seabass          | GQ120525      |

|          |                |           |
|----------|----------------|-----------|
| China    | Pearl gentian  | MG637439  |
| Malaysia | Asian seabass  | EU380202  |
| Malaysia | Golden pompano | HQ859932  |
| Taiwan   | Dragon grouper | AF245004  |
| Portugal | Seabream       | LC581281* |

b)

| Country     | Origin                                | Access number |
|-------------|---------------------------------------|---------------|
| Norway      | Atlantic salmon                       | KX355260      |
| Norway      | Atlantic salmon                       | AY379737      |
| Norway      | Atlantic salmon                       | KX355241      |
| Norway      | Atlantic salmon                       | KX355225      |
| Norway      | Atlantic salmon                       | KX355244      |
| Norway      | Atlantic salmon                       | MH562010      |
| Norway      | Atlantic salmon                       | MH562014      |
| Norway      | Atlantic salmon                       | MH561943      |
| Norway      | Atlantic salmon                       | MH561975      |
| Norway      | Atlantic salmon                       | AY374435      |
| Chile       | Atlantic salmon                       | KX523805      |
| Chile       | Atlantic salmon                       | KX523802      |
| Norway      | Atlantic salmon                       | MH561992      |
| Norway      | Atlantic salmon                       | MH562002      |
| Norway      | Atlantic salmon                       | MH562000      |
| Norway      | Atlantic salmon                       | MH562011      |
| Norway      | Atlantic salmon                       | MH561997      |
| Norway      | Atlantic salmon                       | MH561948      |
| China       | Japanese flounder/<br>Bastard halibut | EU161285      |
| South Korea | Japanese flounder                     | AY283784      |
| Japan       | Yellowtail                            | AB006783      |
| Japan       | Japanese amberjack/<br>yellowtail     | AY283785      |
| Japan       | Yellowtail                            | AY283781      |
| Japan       | Japanese flounder                     | AY283783      |
| Japan       | Yellowtail                            | AB011440      |
| Japan       | Yellowtail                            | AB281673      |
| Japan       | Yellowtail                            | AY283782      |
| Korea       | Rockfish                              | AY064396      |
| Portugal    | Atlantic horse mackerel               | LC581280*     |

c)

| Country   | Origin                | Access number |
|-----------|-----------------------|---------------|
| USA       | Bluegill              | KX058433      |
| USA       | Bluegill              | NC_030445     |
| Australia | Eastern sea garfish   | MH716822      |
| China     | Greater horseshoe bat | KY962692      |
| China     | Greater horseshoe bat | KY962687      |
| China     | Woolly horseshoe bat  | KY962696      |
| China     | Least horseshoe bat   | KY962705      |
| China     | Pomona roundleaf bat  | NC_038503     |
| China     | Horseshoe bat         | KX513949      |
| Mexico    | Human                 | AB625343      |
| Russia    | Human                 | KY660218      |
| Poland    | Human                 | GQ477473      |
| Nigeria   | Human                 | FN547200      |

|             |                         |           |
|-------------|-------------------------|-----------|
| France      | Human                   | GQ486240  |
| Nigeria     | Human                   | FN547168  |
| Angola      | Human                   | KF849736  |
| Taiwan      | Human                   | EU835940  |
| China       | Human                   | MK171192  |
| Netherlands | Human                   | MH521359  |
| China       | Human                   | KF917508  |
| China       | Human                   | KR013765  |
| Taiwan      | Human                   | KC793068  |
| Indonesia   | Human                   | AB644297  |
| China       | Human                   | KY670780  |
| China       | Human                   | KM455832  |
| China       | Human                   | KM875412  |
| China       | Human                   | KM875413  |
| Taiwan      | Human                   | KC792775  |
| China       | Human                   | MK580119  |
| Japan       | Human                   | AB029956  |
| China       | Human                   | MK170959  |
| China       | Human                   | KY360845  |
| China       | Human                   | JX948756  |
| China       | Human                   | JX948755  |
| China       | Human                   | GQ402152  |
| China       | Human                   | KY470927  |
| China       | Human                   | KX777514  |
| China       | Human                   | FJ622431  |
| China       | Human                   | KX777461  |
| South Korea | Human                   | KX264903  |
| China       | Human                   | KY361361  |
| China       | Human                   | KY470990  |
| China       | Human                   | MG715397  |
| China       | Human                   | MG826330  |
| China       | Human                   | MG715386  |
| China       | Human                   | MK171235  |
| China       | Human                   | MK170856  |
| China       | Human                   | MK170936  |
| China       | Human                   | MK170895  |
| China       | Human                   | MK171241  |
| China       | Human                   | MK170941  |
| Bangladesh  | Human                   | JQ514420  |
| China       | Human                   | MK170921  |
| India       | Human                   | JN107877  |
| China       | Human                   | KY470916  |
| China       | Human                   | KY470914  |
| Portugal    | Atlantic horse mackerel | LC581279* |

d)

| Country     | Origin | Access number |
|-------------|--------|---------------|
| USA         | Human  | FJ445114      |
| El Salvador | Human  | JX129407      |
| Peru        | Human  | JX129435      |
| USA         | Human  | FJ445115      |
| Switzerland | Human  | JF285315      |
| Switzerland | Human  | JF285314      |
| South Korea | Human  | KC414928      |
| Singapore   | Human  | MH648009      |

|             |       |          |
|-------------|-------|----------|
| Singapore   | Human | MH648008 |
| USA         | Human | MN749149 |
| USA         | Human | MN749151 |
| Austria     | Human | X02316   |
| USA         | Human | JN541268 |
| Australia   | Human | KF543937 |
| USA         | Human | MN306051 |
| Australia   | Human | KF543911 |
| Australia   | Human | KF543912 |
| USA         | Human | DQ473494 |
| Uganda      | Human | MH685691 |
| Uganda      | Human | MH685686 |
| USA         | Human | FJ445139 |
| USA         | Human | FJ445138 |
| USA         | Human | FJ445173 |
| Australia   | Human | KF543933 |
| Singapore   | Human | MH648059 |
| Singapore   | Human | MH648037 |
| El Salvador | Human | JX129408 |
| USA         | Human | KY369875 |
| USA         | Human | FJ445163 |
| South Korea | Human | JX177625 |
| Singapore   | Human | MH648048 |
| USA         | Human | MK167031 |
| USA         | Human | JN798579 |
| USA         | Human | JX074051 |
| USA         | Human | FJ445129 |
| USA         | Human | JN815252 |
| USA         | Human | FJ445125 |
| USA         | Human | DQ473499 |
| USA         | Human | FJ445145 |
| Singapore   | Human | MH648023 |
| USA         | Human | MN306057 |
| USA         | Human | MN306047 |
| USA         | Human | FJ445123 |
| USA         | Human | JQ747747 |
| Australia   | Human | KF543922 |
| Australia   | Human | KF543929 |
| Peru        | Human | JX129450 |
| USA         | Human | JN837693 |
| USA         | Human | FJ445148 |
| USA         | Human | JN112340 |
| USA         | Human | JN621246 |
| USA         | Human | KY369890 |
| Australia   | Human | KF543930 |
| Singapore   | Human | MH648032 |
| Singapore   | Human | MH648046 |
| USA         | Human | JN837692 |
| USA         | Human | FJ445175 |
| USA         | Human | JN798582 |
| USA         | Human | FJ445180 |
| USA         | Human | DQ473495 |
| USA         | Human | JQ994496 |
| USA         | Human | JN541272 |
| USA         | Human | FJ445141 |

|             |          |           |
|-------------|----------|-----------|
| Singapore   | Human    | MH648086  |
| Australia   | Human    | KF543896  |
| Australia   | Human    | KF543895  |
| India       | Human    | KM109982  |
| USA         | Human    | JN614995  |
| USA         | Human    | FJ445135  |
| Australia   | Human    | KF543909  |
| Columbia    | Human    | JX129423  |
| South Korea | Human    | JX177621  |
| Switzerland | Human    | EU840727  |
| USA         | Human    | FJ445140  |
| USA         | Human    | KY369886  |
| Australia   | Human    | GQ323774  |
| Australia   | Human    | EF186077  |
| USA         | Human    | JQ994495  |
| USA         | Human    | JN798570  |
| Kenya       | Human    | MK989744  |
| USA         | Human    | MN306034  |
| USA         | Human    | K02121    |
| USA         | Human    | L05355    |
| Portugal    | Seabream | LC581278* |

e)

| Country        | Origin | Access number |
|----------------|--------|---------------|
| USA            | Human  | JN797508      |
| Hong Kong      | Human  | KT346358      |
| Hong Kong      | Human  | KT589391      |
| French Guiana  | Human  | KC597139      |
| South Korea    | Human  | JX439793      |
| South Korea    | Human  | JX439794      |
| South Korea    | Human  | KU561250      |
| Netherlands    | Human  | JN176920      |
| USA            | Human  | MK754442      |
| USA            | Human  | MK629457      |
| USA            | Human  | MK752942      |
| Japan          | Human  | LC153121      |
| Russia         | Human  | MG892946      |
| Russia         | Human  | MG892955      |
| USA            | Human  | MK756037      |
| United Kingdom | Human  | KY887601      |
| United Kingdom | Human  | NC_039477     |
| United Kingdom | Human  | KY887600      |
| United Kingdom | Human  | KY887603      |
| United Kingdom | Human  | KY887602      |
| United Kingdom | Human  | KY817505      |
| USA            | Human  | MK762570      |
| USA            | Human  | MK762569      |
| Japan          | Human  | LC331997      |
| Japan          | Human  | LC325217      |
| USA            | Human  | MT032004      |
| Portugal       | Human  | MH930953      |
| Japan          | Human  | LC175468      |
| Japan          | Human  | LC153122      |
| USA            | Human  | MK073891      |
| USA            | Human  | MH260484      |

|                |          |           |
|----------------|----------|-----------|
| USA            | Human    | MK775032  |
| USA            | Human    | KY947549  |
| USA            | Human    | MK753033  |
| Japan          | Human    | LC215415  |
| Japan          | Human    | LC213892  |
| Russia         | Human    | MG892929  |
| USA            | Human    | KY947550  |
| United Kingdom | Human    | MH218685  |
| United Kingdom | Human    | KY887599  |
| Portugal       | Seabream | LC581277* |

**Table S2.** Accession numbers of sequences used for phylogenetic analysis (family analysis), including the sequences obtained in this study (\*) and those downloaded from GenBank: a) sequences used for phylogenetic analysis of Viral Nervous Necrosis Virus detected in gilthead seabream gills from Algarve, b) sequences used for phylogenetic analysis of Infectious Pancreatic Necrotic Virus amplified from Atlantic horse mackerel skin from Peniche, c) sequences used for phylogenetic analysis of Hepatitis B virus obtained from Atlantic horse mackerel gills from Algarve, d) sequences used for phylogenetic analysis of Rhinovirus A detected in a gilthead seabream skin sample from Peniche; e) sequences used for phylogenetic analysis of Norovirus GII obtained from gilthead seabream skin from Algarve.

a)

| Country  | Origin             | Access number |
|----------|--------------------|---------------|
| Japan    | Barfin flounder    | NC_013459     |
| Japan    | Barfin flounder    | EU826138      |
| Japan    | Redspotted grouper | NC_008041     |
| China    | Redspotted grouper | AY690596      |
| Japan    | Tiger puffer       | NC_013461     |
| Japan    | Tiger puffer       | EU236149      |
| Portugal | Gilthead seabream  | LC581281*     |
| Japan    | Striped jack       | NC_003449     |
| Japan    | Striped jack       | D30814        |
| USA      | Mosquitoes         | NC_004145     |
| USA      | Mosquitoes         | X15960        |
| USA      | Mosquitoes         | NC_004144     |
| USA      | Black beetle       | X15959        |
| USA      | Black beetle       | X00956        |
| USA      | Mosquitoes         | NC_002691     |
| USA      | Mosquitoes         | AF174534      |
| Peru     | Southern armyworm  | NC_003692     |
| Peru     | Southern armyworm  | AF171943      |

b)

| Country   | Origin             | Access number |
|-----------|--------------------|---------------|
| Germany   | Chicken            | X84034        |
| France    | Chicken            | AJ310185      |
| Canada    | Insects            | NC_004177     |
| China     | Mosquitoes         | JX403941      |
| Germany   | Mosquitoes         | JQ659254      |
| France    | Rotifer            | FM995220      |
| USA       | Mosquitoes         | GQ342962      |
| Singapore | Asian seabass      | MK103419      |
| Vietnam   | Blotched snakehead | NC_005982     |
| Vietnam   | Blotched snakehead | AJ459382      |
| Japan     | Yellowtail         | NC_004168     |

|                |                         |           |
|----------------|-------------------------|-----------|
| Japan          | Yellowtail              | AY283781  |
| Canada         | Fish                    | NC_001915 |
| Canada         | Fish                    | M18049    |
| Portugal       | Atlantic horse mackerel | LC581280* |
| USA            | Bivalve                 | AF342731  |
| United Kingdom | Bivalve                 | AJ920336  |
| United Kingdom | Bivalve                 | NC_038870 |

c)

| Country     | Origin                  | Access number |
|-------------|-------------------------|---------------|
| Brazil      | Capuchin monkey         | KY703886      |
| Brazil      | Capuchin monkey         | NC_043528     |
| USA         | Woolly monkey           | AF046996      |
| USA         | Woolly monkey           | NC_028129     |
| USA         | Human                   | NC_003977     |
| USA         | Human                   | X02763        |
| China       | White-toothed shrew     | MH484442      |
| China       | Asian gray shrew        | MH484438      |
| Myanmar     | Bat                     | NC_020881     |
| China       | Pomona roundleaf bat    | KF939649      |
| China       | Pomona roundleaf bat    | NC_038503     |
| Gabon       | Noack's roundleaf bat   | NC_024443     |
| Gabon       | Noack's roundleaf bat   | KC790376      |
| Ivory Coast | Antelope                | MK620908      |
| USA         | Ground squirrel         | NC_001484     |
| USA         | Ground squirrel         | K02715        |
| USA         | Woodchuck               | M19183        |
| USA         | Woodchuck               | NC_004107     |
| Australia   | Domestic cat            | MH307930      |
| Australia   | Domestic cat            | NC_040719     |
| Panama      | Tent making bat         | KC790381      |
| Panama      | Tent making bat         | NC_024445     |
| Portugal    | Atlantic horse mackerel | LC581279 *    |
| USA         | Bluegill                | KX058433      |
| USA         | Bluegill                | NC_030445     |
| USA         | White sucker            | NC_027922     |
| USA         | White sucker            | KR229754      |
| Germany     | Heron                   | NC_001486     |
| Germany     | Heron                   | M22056        |
| Canada      | Duck                    | AF047045      |
| China       | Duck                    | NC_001344     |
| Poland      | Parakeet                | JX274035      |
| Poland      | Parakeet                | NC_016561     |
| China       | Tibetan frog            | MH700450      |
| China       | Tibetan frog            | NC_030446     |

d)

| Country | Origin               | Access number |
|---------|----------------------|---------------|
| Finland | Human                | NC_001612     |
| Japan   | Human                | NC_001472     |
| Russia  | Human                | AY896767      |
| China   | African green monkey | MN427525      |
| China   | African green monkey | MN427527      |
| China   | African green monkey | MN427528      |
| China   | Rhesus monkey        | KU587555      |

|                |                   |           |
|----------------|-------------------|-----------|
| China          | Rhesus monkey     | NC_029905 |
| Nigeria        | Wastewater        | MT542698  |
| Germany        | Bovine            | MT019688  |
| Germany        | Bovine            | NC_021220 |
| USA            | Human             | DQ092795  |
| Dubai          | Dromedary         | NC_038310 |
| Dubai          | Dromedary         | KP345888  |
| Japan          | Wild boar         | LC316832  |
| Japan          | Wild boar         | LC316831  |
| Japan          | Wild boar         | LC316819  |
| United Kingdom | Human             | NC_001430 |
| Cameroon       | Human             | MK032898  |
| Malawi         | Human             | MN914205  |
| China          | Rodent            | KX156158  |
| China          | Rodent            | NC_038989 |
| USA            | Simian            | NC_038309 |
| USA            | Simian            | AF326759  |
| USA            | Human             | JX193795  |
| USA            | Human             | JX074053  |
| Malaysia       | Human             | KJ675506  |
| Hong Kong      | Human             | NC_009996 |
| USA            | Human             | JX074055  |
| Portugal       | Gilthead seabream | LC581278* |
| USA            | Environment       | MF043119  |

e)

| Country        | Origin            | Access number |
|----------------|-------------------|---------------|
| Japan          | Wild boar         | AB863586      |
| Canada         | Wild boar         | NC_012699     |
| USA            | Rhesus monkey     | NC_043512     |
| USA            | Rhesus monkey     | EU391643      |
| France         | Hare              | NC_002615     |
| Italy          | Wolf              | MF356366      |
| Portugal       | Rabbit            | KF442964      |
| China          | Alpine Musk Deer  | MN478485      |
| United Kingdom | Cattle            | DQ013304      |
| United Kingdom | Cattle            | NC_007916     |
| United Kingdom | Feline            | M86379        |
| USA            | Feline            | NC_001481     |
| USA            | Pig               | NC_002551     |
| USA            | Pig               | U76874        |
| Sweden         | Human             | KX431437      |
| Sweden         | Human             | KY040366      |
| Brazil         | Chicken           | NC_033081     |
| Germany        | Chicken           | HQ010042      |
| Germany        | Turkey            | NC_043516     |
| Germany        | Turkey            | JQ347522      |
| Germany        | Human             | AF093797      |
| Portugal       | Gilthead seabream | LC581277*     |
| Vietnam        | Human             | AF504671      |
| USA            | Fathead minnow    | KX371097      |
| USA            | Fathead minnow    | NC_035675     |
| Canada         | Atlantic salmon   | MN995807      |
| Norway         | Atlantic salmon   | NC_024031     |



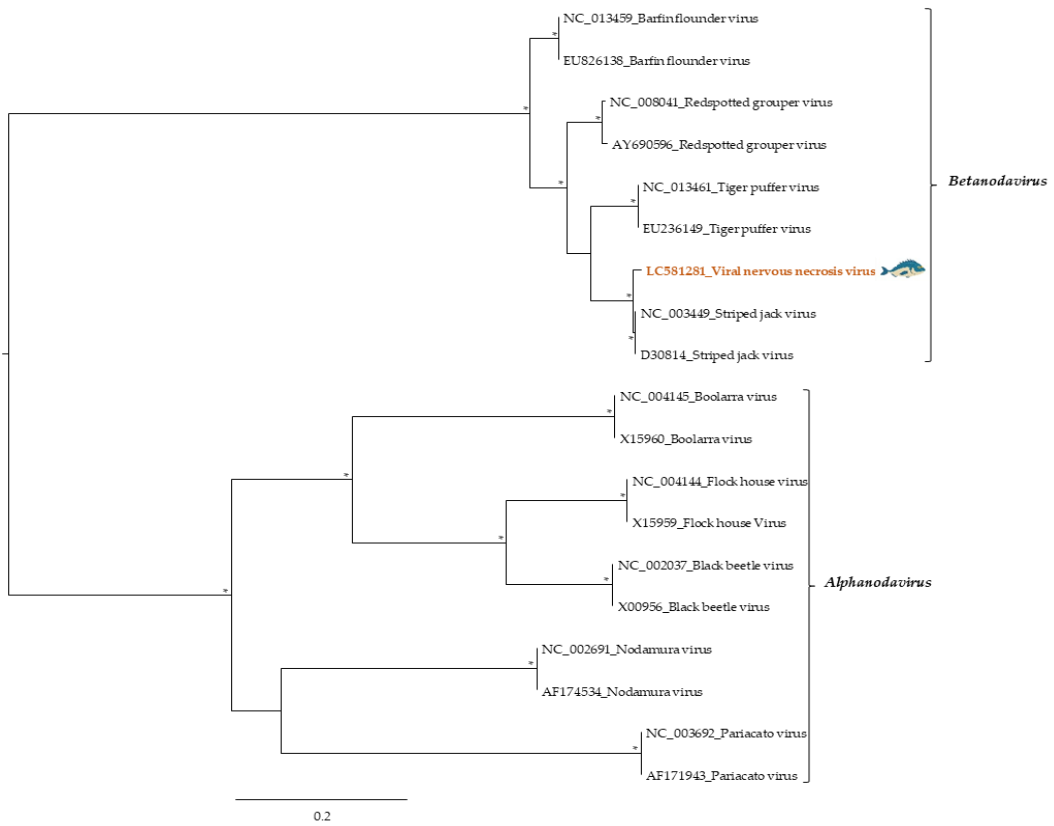

(a)

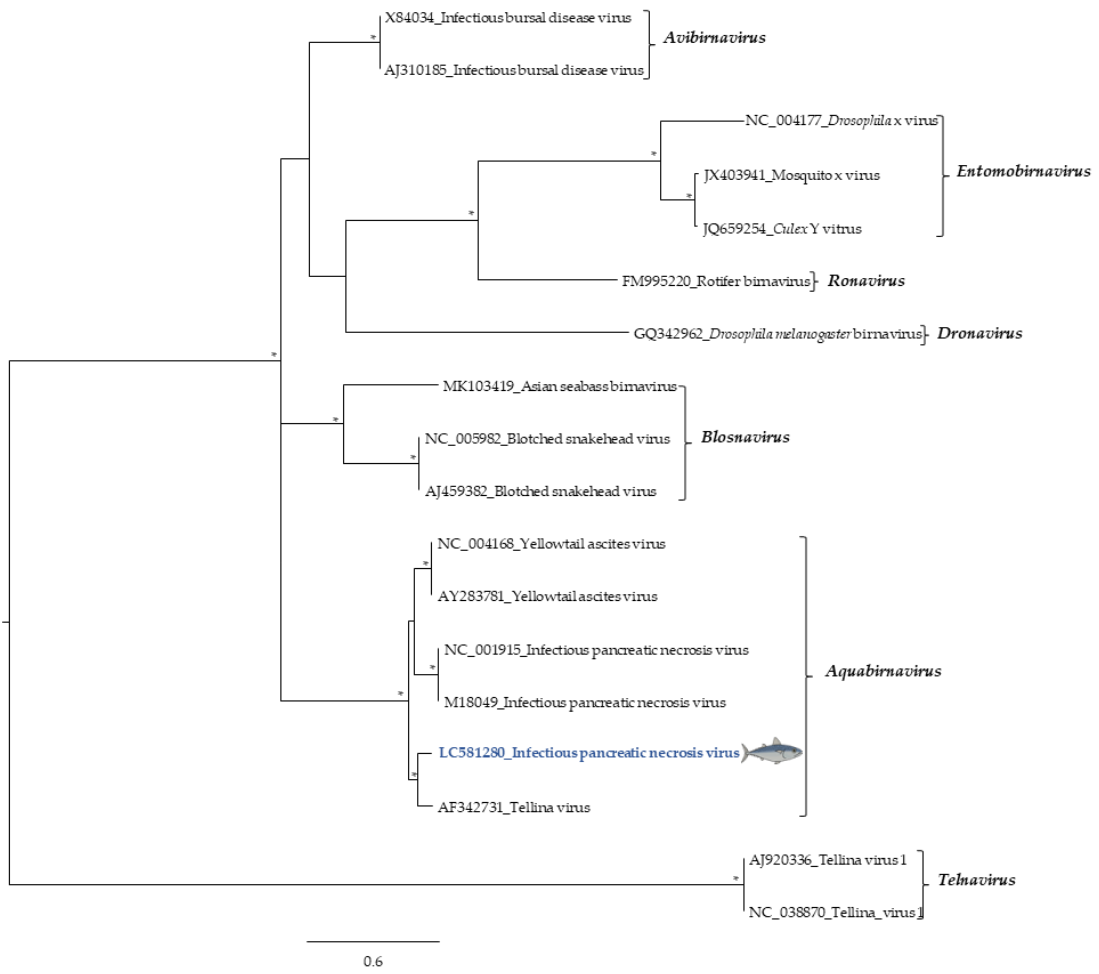

(b)

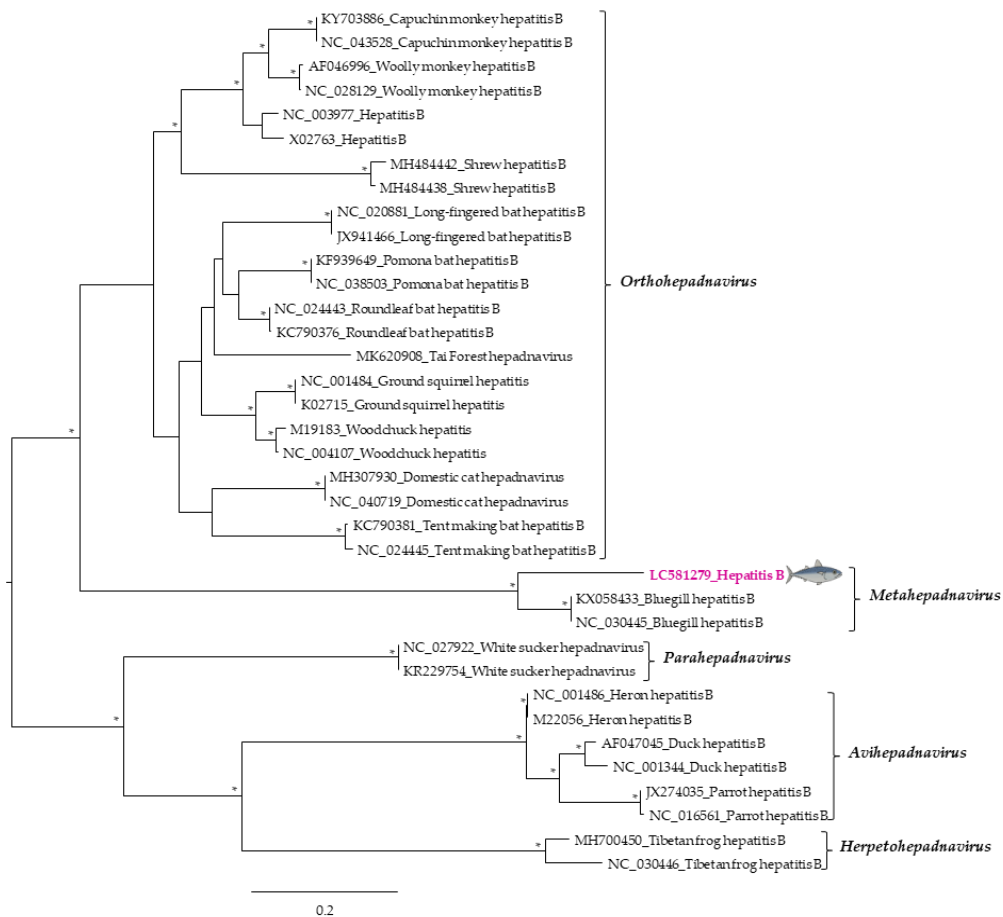

(c)

**Figure S1.** Maximum Likelihood phylogenetics trees of each fish pathogenic viral family identified in this study: a) *Nodaviridae* (including a partial sequence of Viral Nervous Necrosis Virus detected in gilthead seabream gills from Algarve), b) *Birnaviridae* (including a partial sequence of Infectious Pancreatic Necrotic Virus obtained from Atlantic horse mackerel skin from Peniche), and c) *Hepadnaviridae* (including a partial sequence of Hepatitis B virus obtained from Atlantic horse mackerel gills from Algarve). The viral sequences analysed in this study are coloured and highlighted by fish. All viral sequences are identified by their accession number and name. At specific branch nodes, bootstrap values  $\geq 0.60$  are displayed by \*.

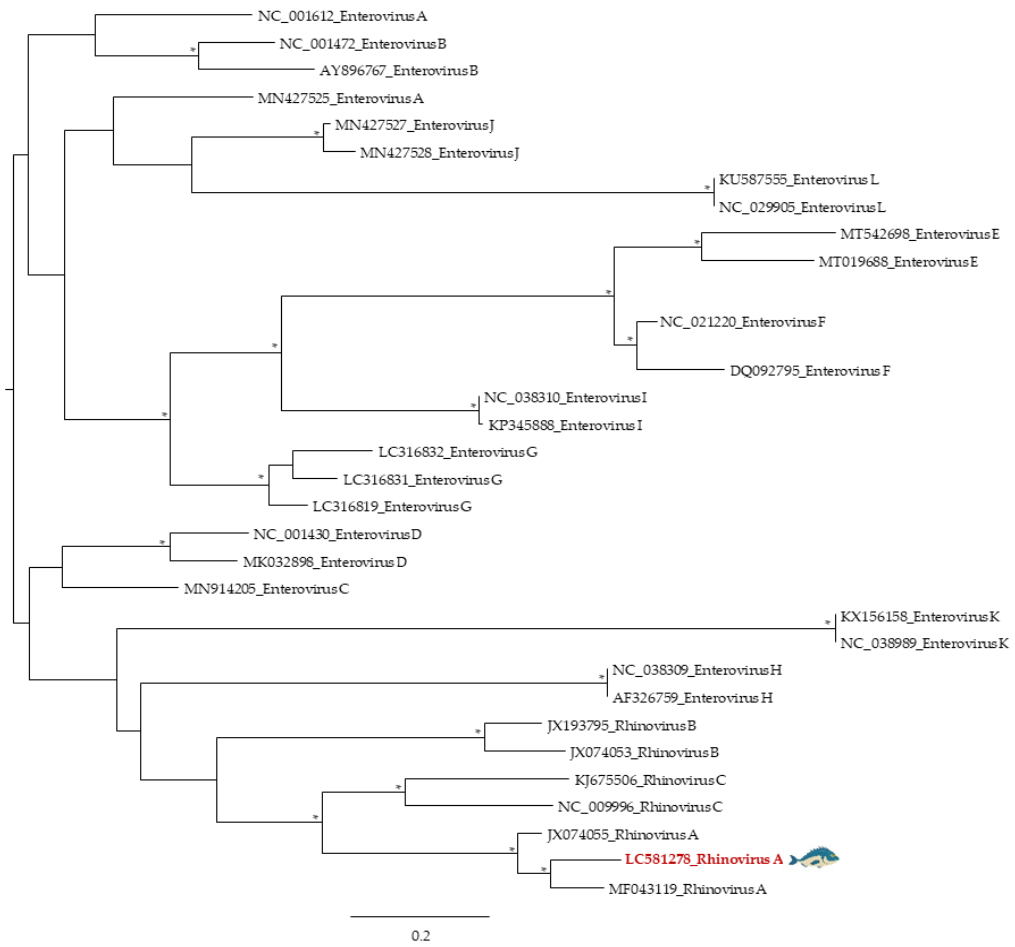

(a)

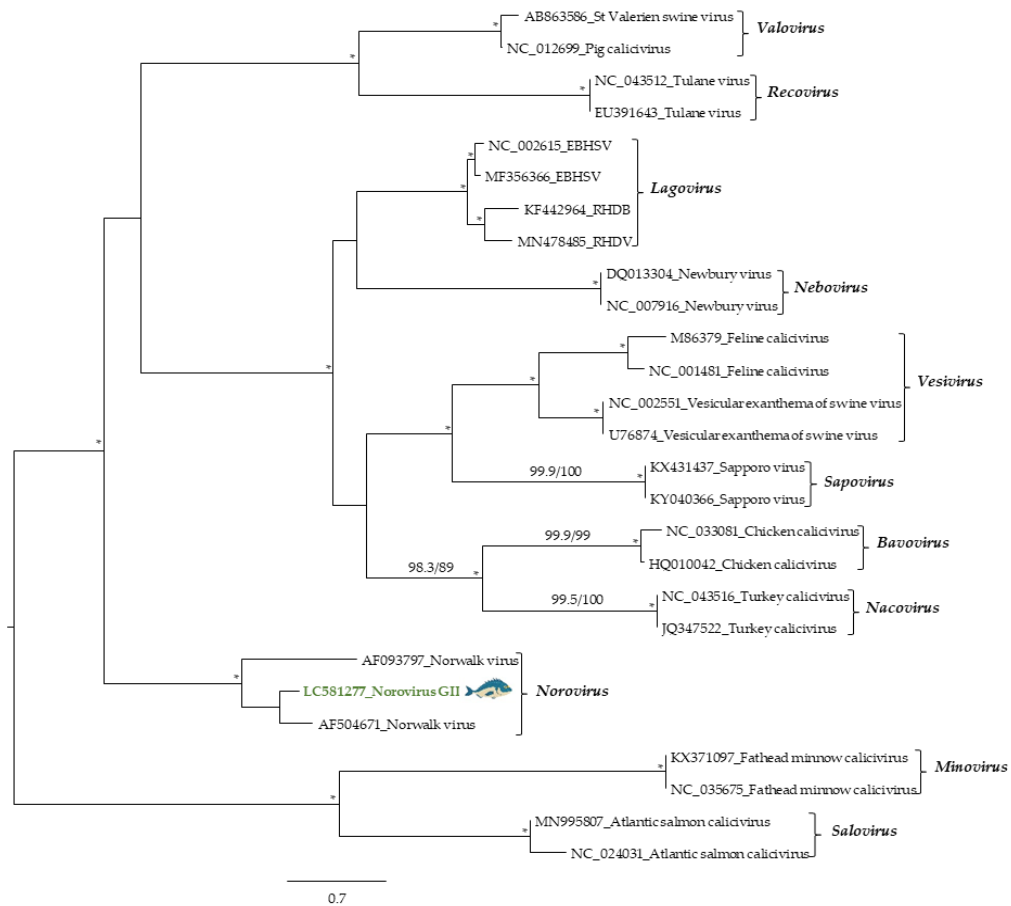

(b)

**Figure S2.** Maximum Likelihood phylogenetics trees of each human pathogenic viral family identified in this study: a) *Picornaviridae* (partial sequence of Rhinovirus A obtained in gilthead seabream skin from Peniche); b) *Caliciviridae* (partial sequence of Norovirus GII obtained in gilthead seabream skin from Algarve). Due to the high genetic diversity observed in *Picornaviridae*, the phylogenetic tree for this taxon was constructed based on the alignment of the closest sequences from a phylogenetic point of view. The viral sequences analysed in this study are coloured and highlighted by a blue fish. All viral sequences are identified by their accession number and name. At specific branch nodes, bootstrap values  $\geq 0.60$  are displayed by \*.
